# Supplementary material for: Revisiting the statistical analysis of pyroclast density and porosity data
Source: Copernicus journal article supplement (doi:10.5194/se-6-869-2015), 2015-07-24
Supplement: Supplementary file 1 [file se-6-869-2015-supplement.zip]

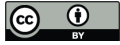

## *Supplement of*

# **Revisiting the statistical analysis of pyroclast density and porosity data**

**B. Bernard et al.**

*Correspondence to:* B. Bernard (bbernard@igepn.edu.ec)

- se-6-869-2015-supplement-title-page.pdf
- Supplement
  - Supplement A Chachimbiro dataset
    - \* CHA-BB-009-F.csv
    - \* CHA-BB-009-G.csv
    - \* CHA-BB-009-H.csv
    - \* CHA-BB-018-B.csv
    - \* CHA-BB-018-C.csv
    - \* CHA-BB-021-B.csv
    - \* CHA-BB-021-E.csv
    - \* CHA-BB-022-B.csv
    - \* CHA-BB-082-G.csv
    - \* CHA-BB-083-C.csv
    - \* CHA-BB-086-A.csv
    - \* CHA-BB-088-B.csv
    - \* CHA-BB-089-A.csv
    - \* CHA-BB-092-B.csv
    - \* CHA-BB-095-A.csv
    - \* CHA-BB-095-B.csv
    - \* CHA-BB-096-B.csv
    - \* CHA-BB-098-B.csv
    - \* CHA-BB-098-C.csv
    - \* CHA-BB-099-A.csv
    - \* CHA-BB-099-E.csv
    - \* CHA-BB-106-A.csv
    - \* CHA-BB-107-A.csv
    - \* CHA-BB-108-A.csv
    - \* CHA-BB-109-A.csv

- \* CHA-BB-117-A.csv
- \* CHA-BB-117-B.csv
- \* CHA-BB-135-A.csv
- \* CHA-BB-195-A.csv
- \* CHA-BB-198-A.csv
- \* CHA-BB-199-A.csv
- \* CHA-BB-201-A.csv
- Supplement B Unzen dataset
  - \* MP-01.csv
  - \* MP-02.csv
  - \* MP-03.csv
  - \* MP-04.csv
  - \* MP-05.csv
  - \* MP-06.csv
  - \* MP-07.csv
  - \* MP-08.csv
  - \* MP-09.csv
  - \* MP-10.csv
  - \* MP-11.csv
  - \* MP-12.csv
  - \* MP-13.csv
  - \* MP-14.csv
  - \* MP-15.csv
  - \* MP-16.csv
  - \* MP-17.csv
  - \* MP-18.csv
  - \* MP-19.csv
  - \* MP-20.csv
  - \* MP-21.csv
  - \* MP-22.csv
  - \* MP-23.csv
  - \* MP-24.csv
  - \* MP-25.csv
  - \* MP-26.csv
  - \* MP-27.csv
  - \* MP-28.csv
  - \* MP-29.csv
  - \* MP-30.csv
  - \* MP-31.csv
- Supplement C Statistical code R MatLab and Spreadsheet
  - \* Density and Porosity spreadsheet.xls
  - \* stats.R
  - \* stats.m
- Supplement D Density and Porosity Statistics.xls

The copyright of individual parts of the supplement might differ from the CC-BY 3.0 licence.
